# Supplementary material for: Quasi-static 3D structure of graphene ripple measured using aberration-corrected TEM
Source: Royal Society of Chemistry journal article supplement (doi:10.1039/d1nr00237f), 2021-01-01
Supplement: d1nr00237f1.pdf [file d1nr00237f1.pdf]

1 **Supplementary Material:**

2 **Quasi-static 3D structure of graphene ripple measured using aberration-corrected TEM**

3

4 Yuhiro Segawa,<sup>a,\*</sup> Kenji Yamazaki,<sup>a</sup> Jun Yamasaki,<sup>b,c</sup> Kazutoshi Gohara<sup>a,\*</sup>

5

6 *<sup>a</sup>Division of Applied Physics, Graduate School of Engineering, Hokkaido University Sapporo*

7 *063-8628, Japan*

8 *<sup>b</sup>Research Center for Ultra-High Voltage Electron Microscopy, Osaka University, 7-1,*

9 *Mihogaoka, Ibaraki, Osaka 567-0047, Japan*

10 *<sup>c</sup>Institute of Materials and Systems for Sustainability, Nagoya University, Furo-cho, Chikusa,*

11 *Nagoya 464-8601, Japan*

12

13 **Corresponding Authors:**

14 \* E-mail: yuhiro26@eis.hokudai.ac.jp (Y.S.)

15 \*E-mail: gohara@eng.hokudai.ac.jp (K.G.)

16

1 **Figure S1. The method of determining the defocus value of the six-membered ring of the**  
2 **TEM image.**

3 **Figure S2. TEM images of six-membered rings.**

4 **Figure S3. Intensity distribution of TEM images of the six-membered ring.**

5 **Figure S4. 3D reconstruction of 15 through-focus TEM images.**

6 **Figure S5. AFM images and cross-sectional profiles of a TEM grid before and after**  
7 **graphene transfer.**

8 **Figure S6. Z error per atom with respect to the number of sine waves.**

9 **Figure S7. Ripple structures.**

10

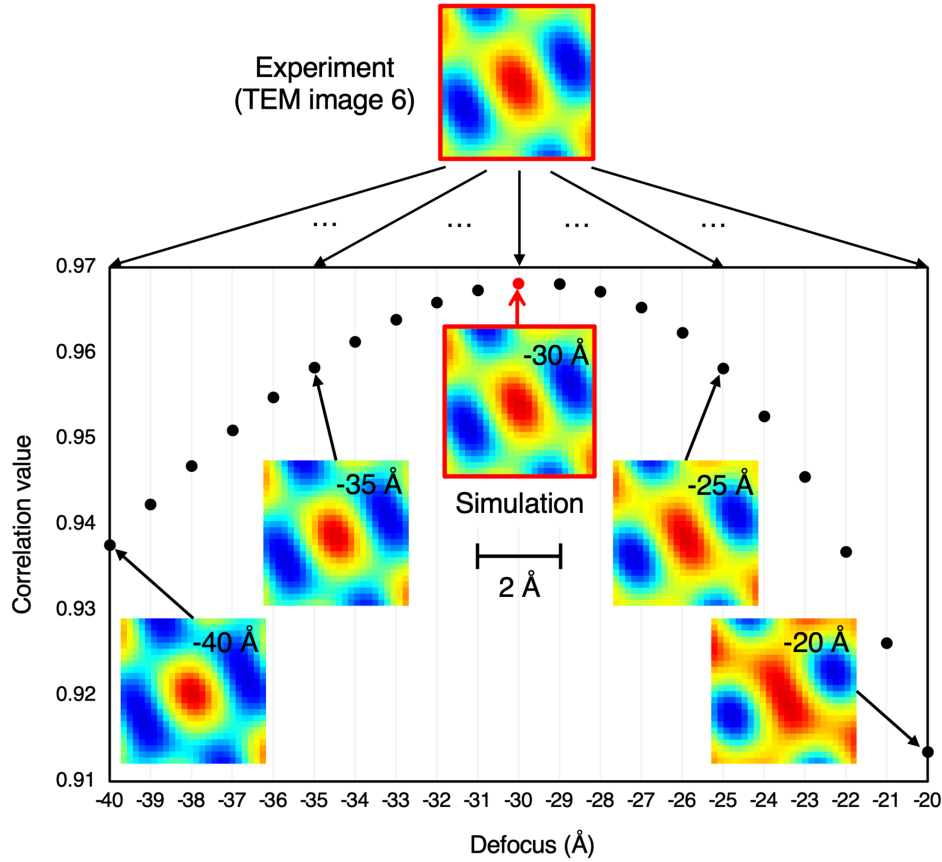

1  
 2 **Figure S1. The method of determining the defocus value of the six-membered ring of the**  
 3 **TEM image.**

4 This is a graph showing the change in correlation value when the TEM image 6 in Fig. 3a is  
 5 compared with the six-membered ring of the library. The horizontal axis is the defocus value of  
 6 the six-membered ring of the library, and the vertical axis is the correlation value. It can be seen  
 7 that the peak (red plot) is at -30 Å and that the correlation value decreases as the difference from -  
 8 30 Å increases. In the method used in this paper, the defocus value of the library that becomes the  
 9 peak is used as the defocus value of the six-membered ring. Only one unique peak appeared and  
 10 the same was true for all 15 TEM images used for reconstruction. Therefore, the six-membered  
 11 ring image in the experiment can uniquely determine the defocus value. The accuracy of the  
 12 determined defocus value is  $\pm 1$  Å.

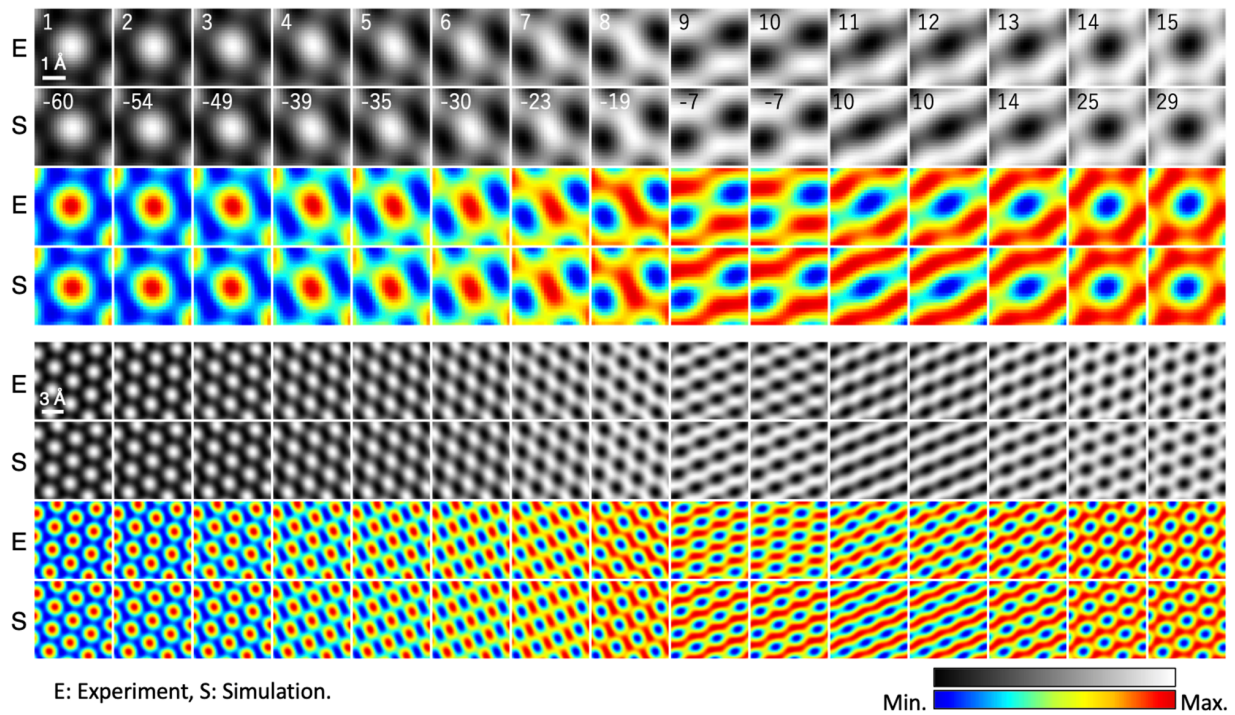

2 **Figure S2. TEM images of six-membered rings.**

3 The sizes of one and seven six-membered rings are presented as the grayscale and pseudo colors,  
 4 respectively. The grayscale makes it easier to imagine the image obtained by TEM observation.  
 5 Pseudo colors have the effect of making it easier to see slight contrast differences in the intensities  
 6 of 2D images.

7



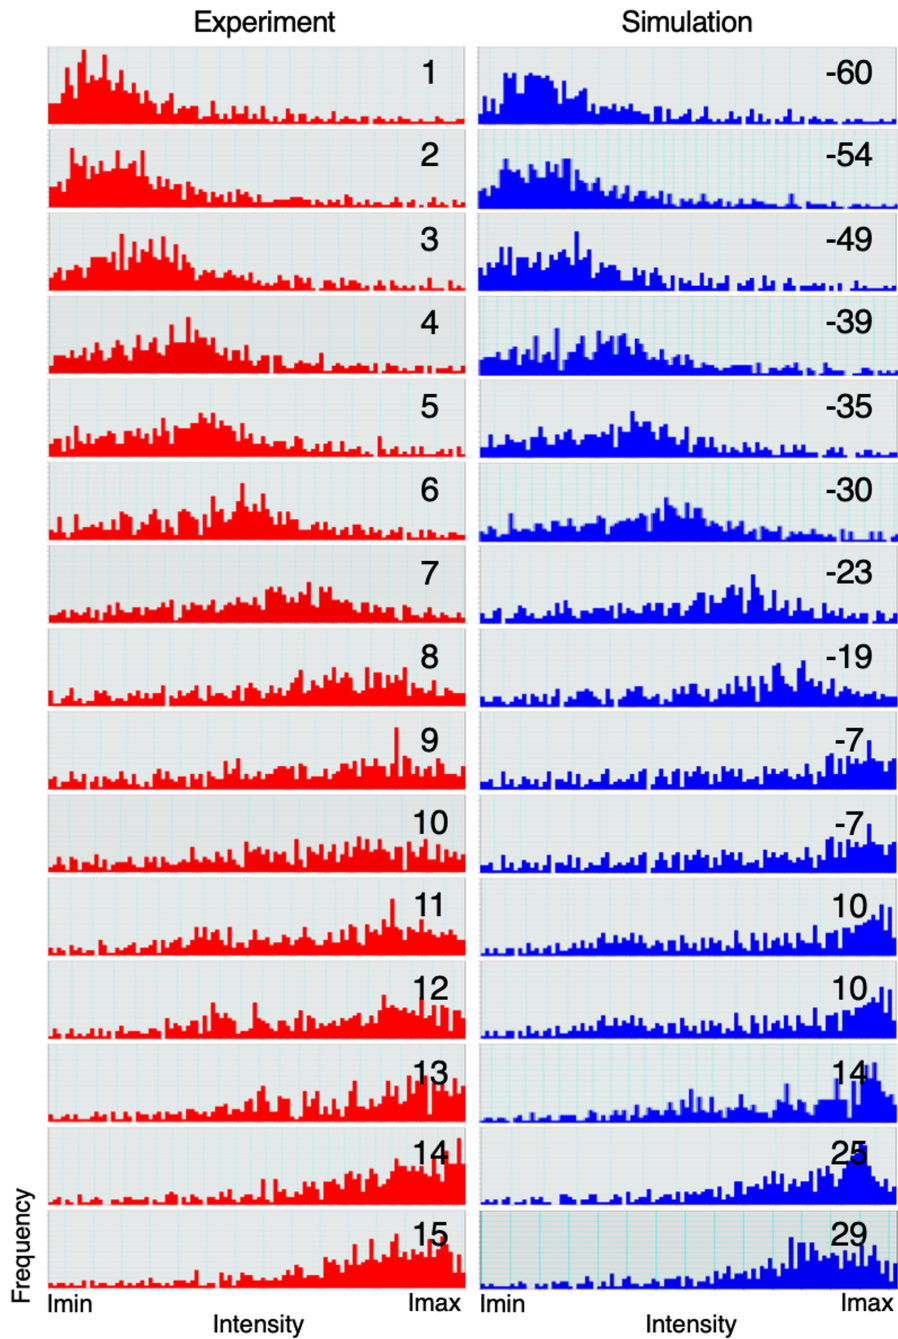

1

2

**Figure S3. Intensity distribution of TEM images of the six-membered ring.**

3

The horizontal and vertical axes represent intensity and frequency, respectively. It was

4

confirmed that the experiment and the simulation were in good agreement also in the intensity

5

distribution of the six-membered ring.

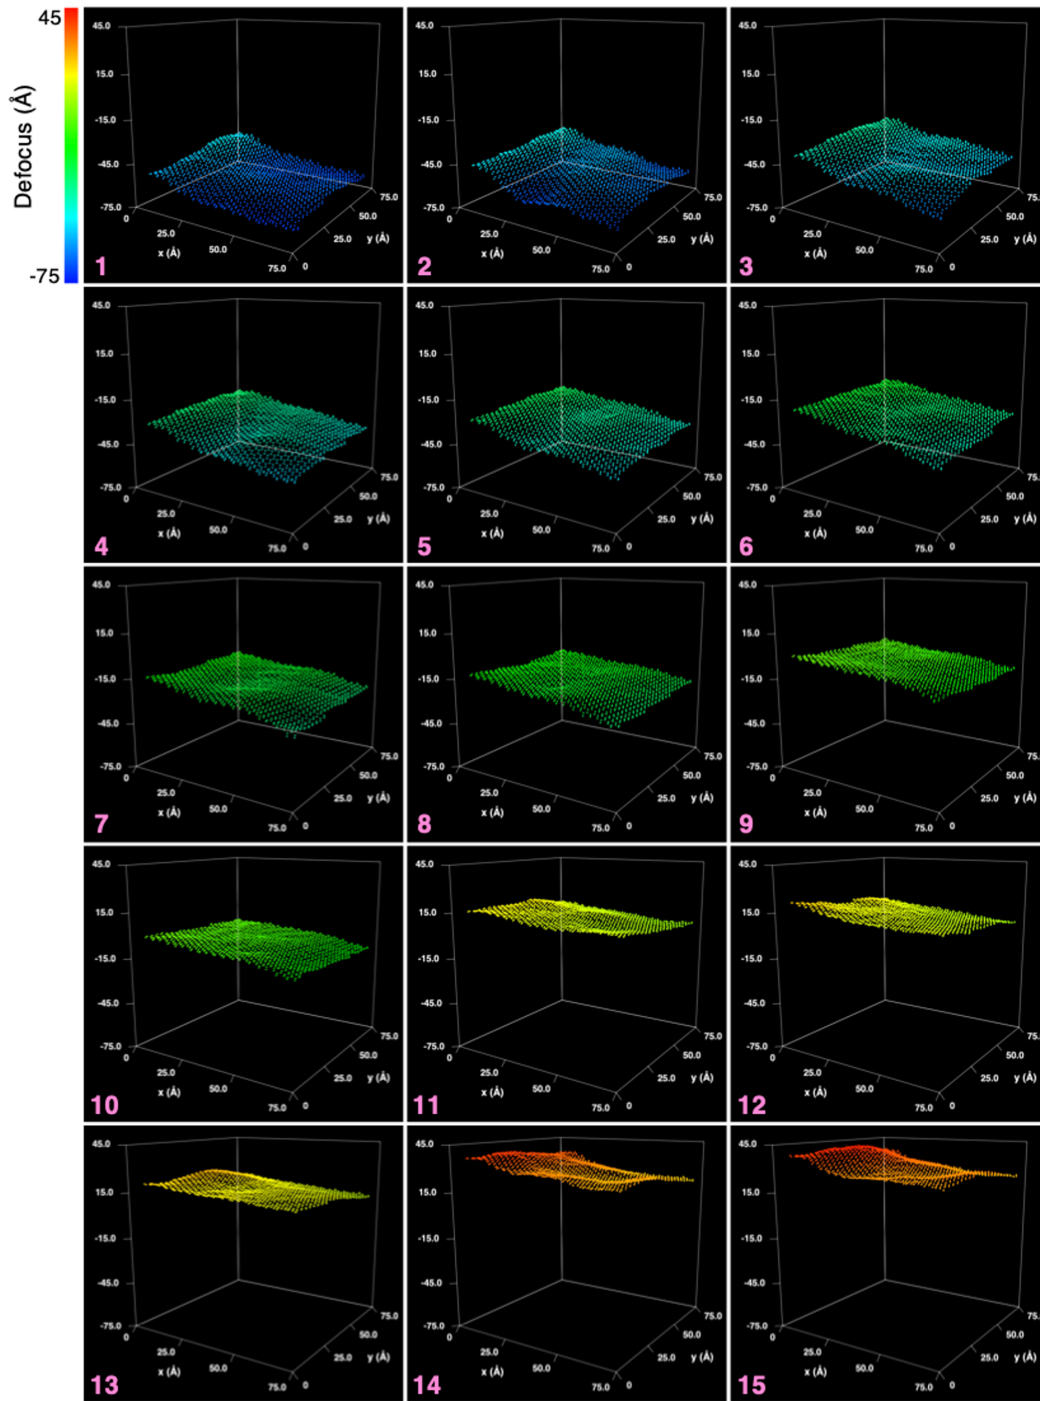

1  
2  
3

Figure S4. 3D reconstruction of 15 through-focus TEM images.

4 The vertical axis is defocus (Å).

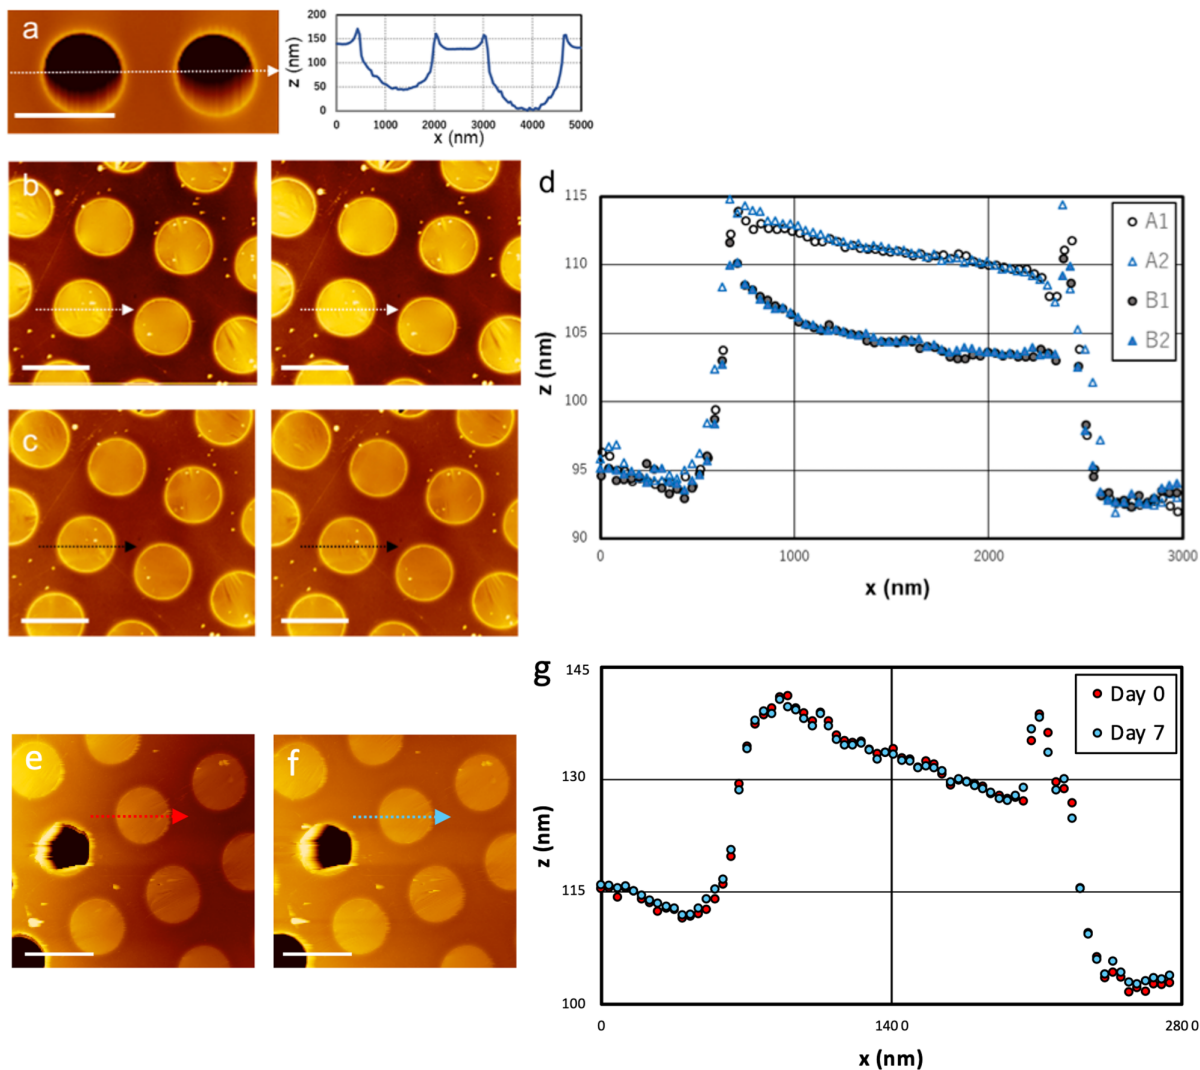

1

2  
3

4 **Figure S5. AFM images and cross-sectional profiles of a TEM grid before and after**  
5 **graphene transfer. All scale bars are 2  $\mu\text{m}$ .**

6 a. An AFM image and a cross-sectional profile of a TEM grid without graphene transfer. Cross-  
7 sectional profiles along the straight line indicated by the white arrows in the AFM image. It can  
8 be confirmed from the profile that the edge of the hole is raised about 20 nm.

9 b. Consecutive AFM images of holes with graphene transferred after TEM observation.

1 c. Consecutive AFM images of holes with graphene transferred before TEM observation. The  
2 same area is observed in b.

3 d. Cross-sectional profiles along the straight line indicated by the white and black arrows in the  
4 AFM images of b and c A1 and A2, B1 and B2 are cross-sectional profiles obtained from the first  
5 and second observations performed after and before the TEM observation, respectively. The same  
6 structure appears in A1 and A2, and B1 and B2 with a difference of 1 nm or less in height.

7 e. AFM image of holes with graphene transferred. The data are from another specimen that was  
8 not observed by TEM.

9 f. AFM image 7 days after e. The same area is observed in e. The TEM grid was stored in a  
10 desiccator during that time.

11 g. Cross-sectional profiles along the straight line indicated by the red and blue arrows in the  
12 AFM images of e and f. The same structure appears in e and f with a difference of 1 nm or less in  
13 height. Strictly speaking, the state of the cantilever position and that of the laser irradiation position  
14 differ between days 0 and 7. However, since the same structure is measured, subtle differences in  
15 measurement conditions do not significantly affect the results.

16 From the above results, the change ( $\sim 6$  nm) shown in this paper is more than the measurement  
17 error by AFM and supports the change of the TEM sample.

18

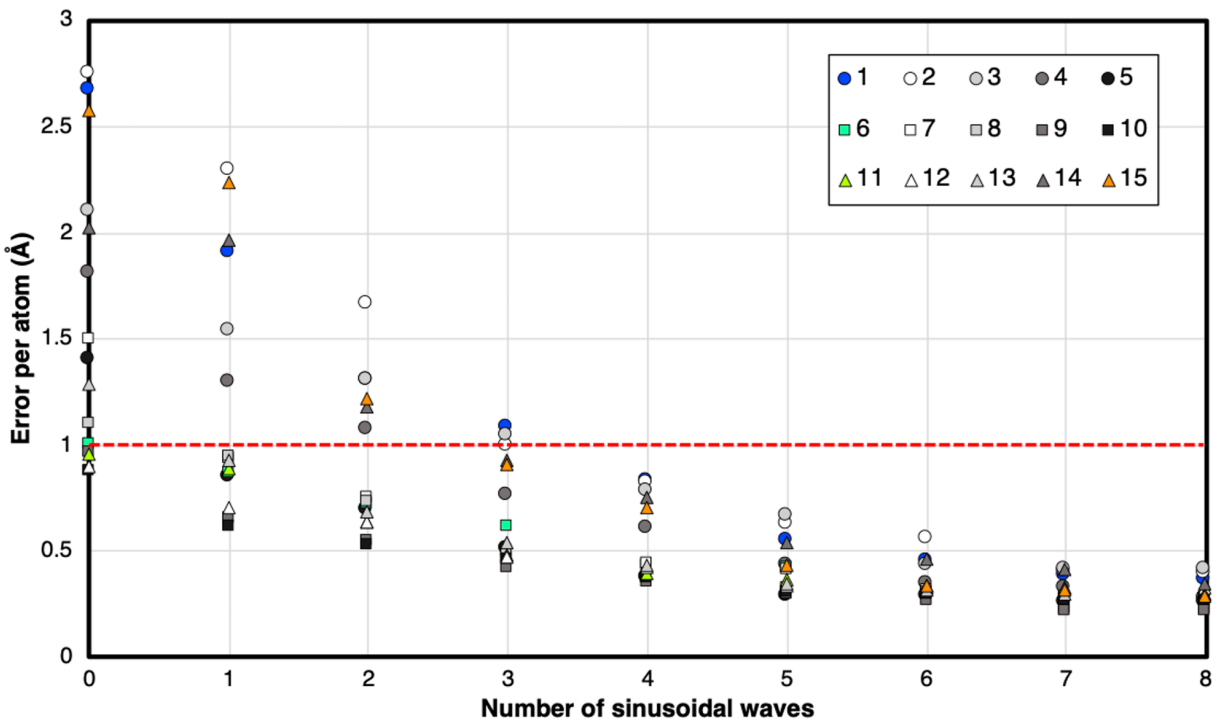

1

2 **Figure S6. Z error per atom with respect to the number of sinusoidal waves.**

3 The horizontal axis is the number of sinusoidal waves used in the approximation function, and  
 4 the vertical axis is the z error per atom ( $\text{\AA}$ ). The red dotted line shows the standard deviation of the  
 5 height error  $1 \text{ \AA}$  in the numerical simulation in Fig. 1b.

6

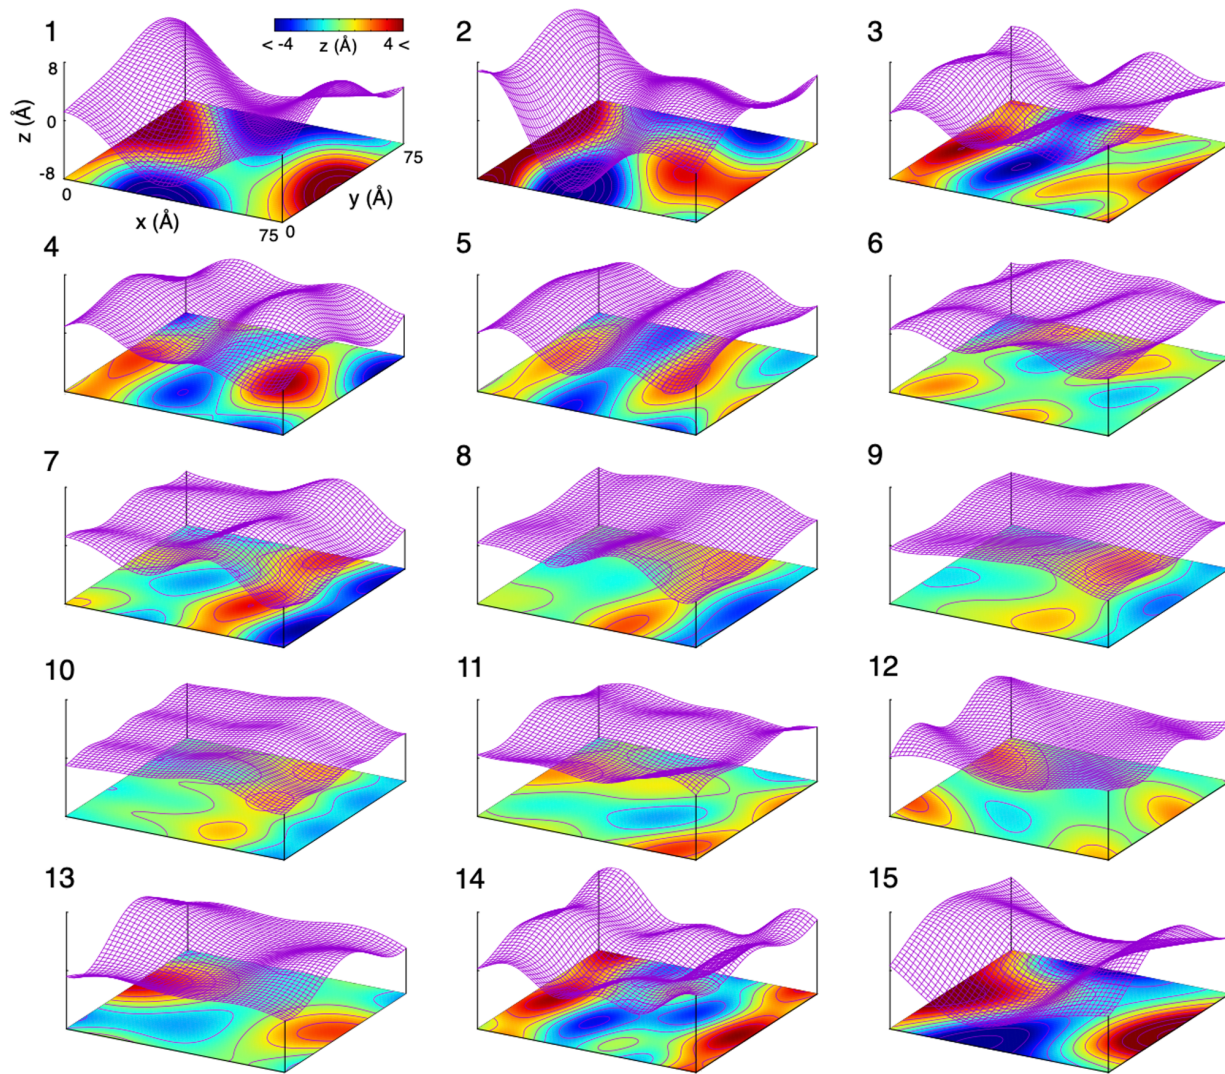

1

2 **Figure S7. Ripple structures.**

3 Each ripple structure was composed of three sinusoidal waves whose directions corresponded to  
 4 the vector of the six-membered ring, as shown in Fig. 5g.

5
